# Supplementary material for: A Comprehensive Review of Ixekizumab Efficacy in Nail Psoriasis from Clinical Trials for Moderate-to-Severe Psoriasis and Psoriatic Arthritis
Source: PubMed Central journal article supplement — Rheumatol Ther. 2023 Jul 3;10(5):1127–46. doi: 10.1007/s40744-023-00553-1 (PMC10469116; doi:10.1007/s40744-023-00553-1), 2023-07-03

# **A Comprehensive Narrative Review of Ixekizumab Efficacy in Nail Psoriasis from Clinical Trials for Moderate-to-Severe Psoriasis and Psoriatic Arthritis**

## **Authors**

Bruce W Kirkham<sup>1</sup>, Alexander Egeberg<sup>2,3</sup>, Frank Behrens<sup>4</sup>, Andreas Pinter<sup>5</sup>, Joseph F Merola<sup>6</sup>, Thorsten Holzkämper<sup>7</sup>, Gaia Gallo<sup>7</sup>, Khai Jing Ng<sup>7</sup>, Rebecca Bolce<sup>7</sup>, Christopher Schuster<sup>7,8</sup>, Peter Nash<sup>9</sup>, Luis Puig<sup>10</sup>.

## **Author Affiliations**

<sup>1</sup> Guy's and St Thomas' NHS Foundation Trust, London, UK

<sup>2</sup> Department of Dermatology, Bispebjerg Hospital, Copenhagen, Denmark

<sup>3</sup> Department of Clinical Medicine, University of Copenhagen, Copenhagen, Denmark

<sup>4</sup> Rheumatology Department University Hospital and Fraunhofer Institute for Translational Medicine & Pharmacology ITMP, Fraunhofer Cluster of Excellence Immune-Mediated Diseases, Goethe University Frankfurt, Frankfurt am Main, Germany

<sup>5</sup> Department of Dermatology, Venereology and Allergology, University Hospital Frankfurt, Frankfurt am Main, Germany

<sup>6</sup> Dermatology and Medicine, Division of Rheumatology and Immunology, Brigham and Women's Hospital, Harvard Medical School, Boston, Massachusetts, USA

<sup>7</sup> Eli Lilly and Company, Indianapolis, Indiana, USA

<sup>8</sup> Department of Dermatology, Medical University of Vienna, Vienna, Austria

<sup>9</sup> Department of Medicine, University of Queensland, Rheumatology Research Unit, Sunshine Coast, Queensland, Australia

<sup>10</sup> Department of Dermatology, Hospital de la Santa Creu i Sant Pau, Universitat Autònoma de Barcelona, Barcelona, Spain

**Corresponding Author:** Bruce W Kirkham ([bruce.kirkham@gstt.nhs.uk](mailto:bruce.kirkham@gstt.nhs.uk))

**Address:** Guy's and St Thomas' NHS Foundation Trust, London, UK

**Email:** [bruce.kirkham@gstt.nhs.uk](mailto:bruce.kirkham@gstt.nhs.uk)

**Supplemental Figure 1:** Summary of nail psoriasis data across IXE trials in patients with PsO with concomitant nail psoriasis at baseline

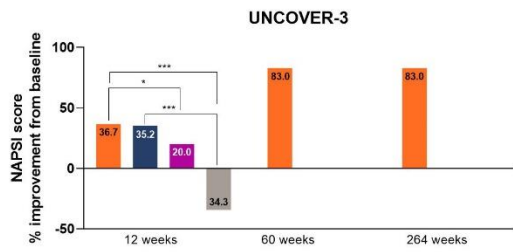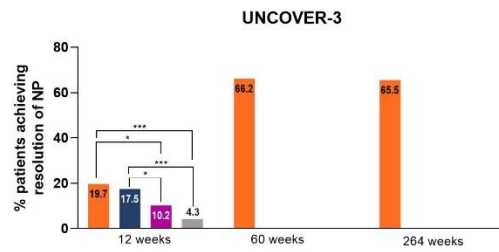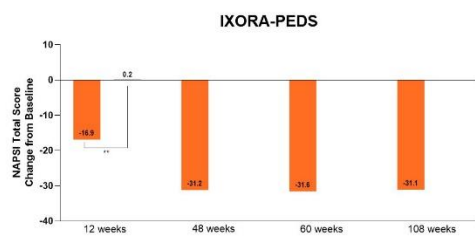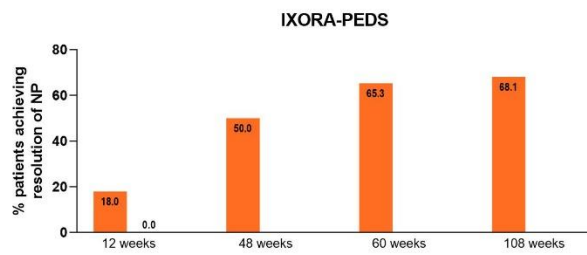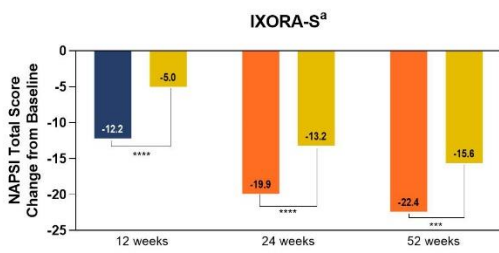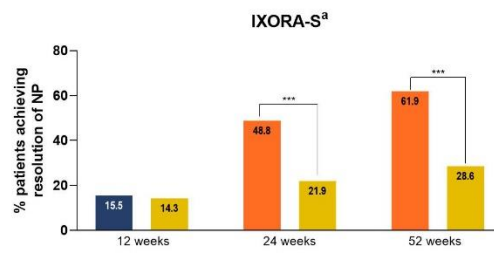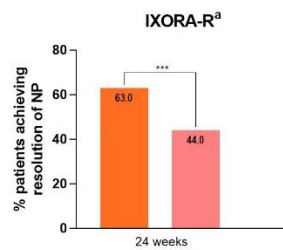

■ IXE Q4W    ■ IXE Q2W    ■ UST  
■ ETN    ■ GUS    ■ PBO

**Supplemental Figure 2:** Summary of nail psoriasis data across IXE trials in patients with PsA with concomitant nail psoriasis at baseline

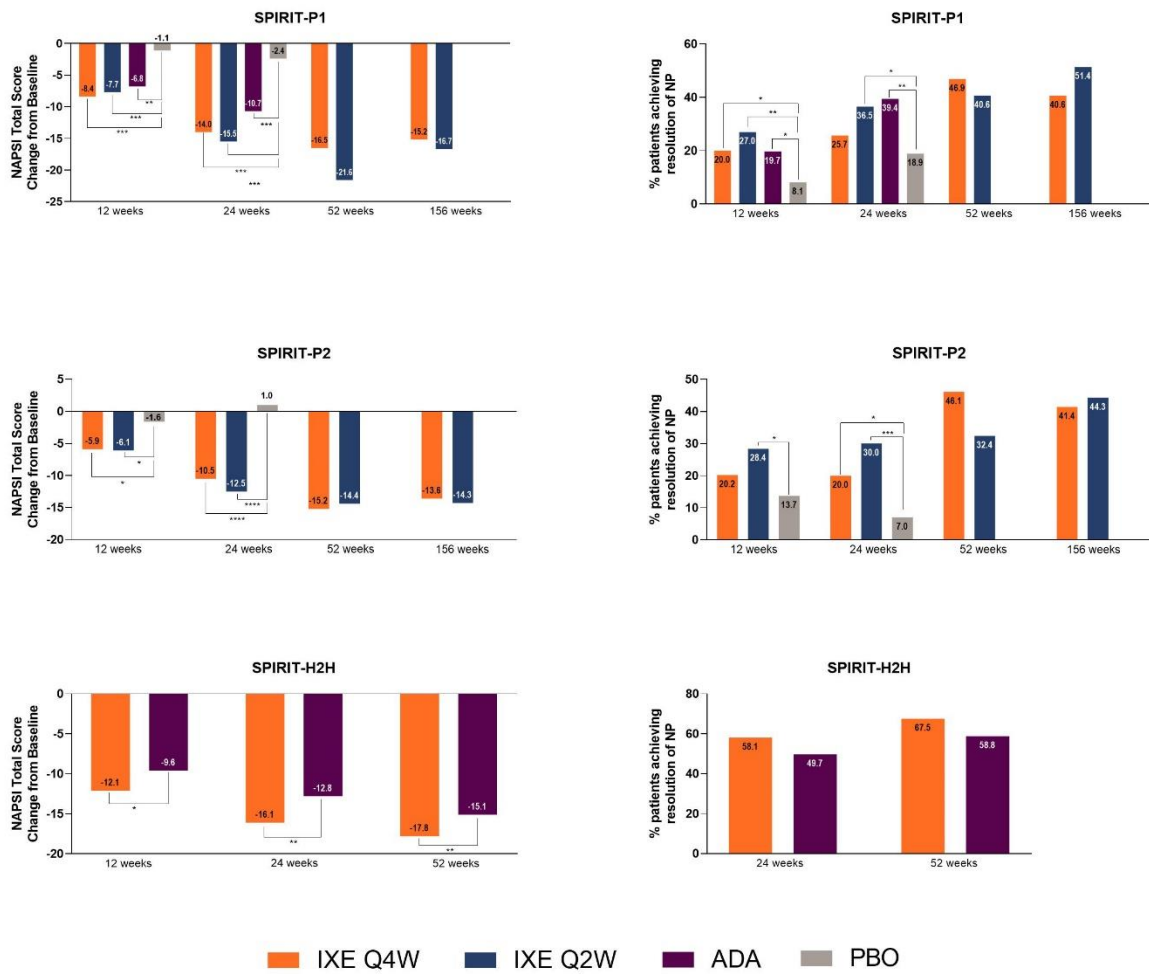

Supplement: 40744_2023_553_MOESM1_ESM.pdf [file 40744_2023_553_MOESM1_ESM.pdf]
